# Supplementary material
Source: MDPI journal article supplement (https://www.mdpi.com/2071-1050/16/7/2970)
Supplement: s1 [file s1]

## Supplementary Material

| Localities                                       | Date   | <i>A. spiniferus</i><br>puparia | N° adult emerged parasitoids |                              | <i>sex-ratio</i> | Parasitization<br>rate |
|--------------------------------------------------|--------|---------------------------------|------------------------------|------------------------------|------------------|------------------------|
|                                                  |        |                                 | <i>Eretmocer</i> us sp.<br>♀ | <i>Eretmocer</i> us sp.<br>♂ |                  |                        |
| <b>Campania:</b><br>Piana di Monte<br>Verna (CE) | Jul 19 | 112                             | 0                            | 0                            | na               | 0.00%                  |
|                                                  | Oct 14 | 19                              | 12                           | 0                            | 1                | 63.16%                 |
| <b>Apulia:</b><br>Bari (BA)                      | Jul 14 | 172                             | 3                            | 4                            | 0.43             | 4.07%                  |
| <b>Marche:</b><br>Grottammare<br>(AP)            | Aug 9  | 304                             | 37                           | 38                           | 0.49             | 24.67%                 |
|                                                  | Sep 20 | 697                             | 123                          | 63                           | 0.66             | 26.69%                 |

Table S1. Infestation and parasitization data in the localities of occasional collections along with sex ratio of the emerged *Eretmocer*us sp. gr. *serius*. na: not available data

| Sampling Date | <i>A. spiniferus</i> puparia | N° adult emerged parasitoids |                          | sex-ratio | Parasitization rate |
|---------------|------------------------------|------------------------------|--------------------------|-----------|---------------------|
|               |                              | <i>Eretmoceris</i> sp. ♀     | <i>Eretmoceris</i> sp. ♂ |           |                     |
| May 31        | 102                          | 25                           | 1                        | 0.96      | 25.49%              |
| Jun 5         | 175                          | 88                           | 2                        | 0.98      | 51.43%              |
| Jun 10        | 84                           | 5                            | 0                        | 1         | 5.95%               |
| Jun 18        | 41                           | 0                            | 0                        | na        | 0%                  |
| Jun 25        | 39                           | 0                            | 0                        | na        | 0%                  |
| Jul 2         | 112                          | 0                            | 0                        | na        | 0%                  |
| Jul 9         | 190                          | 2                            | 3                        | 0.40      | 2.63%               |
| Jul 16        | 244                          | 4                            | 2                        | 0.67      | 2.46%               |
| Jul 23        | 120                          | 6                            | 0                        | 1         | 5%                  |
| Jul 29        | 98                           | 8                            | 3                        | 0.73      | 11.22%              |
| Aug 5         | 75                           | 13                           | 6                        | 0.68      | 25.33%              |
| Aug 25        | 88                           | 3                            | 0                        | 1         | 3.41%               |
| Sep 1         | 77                           | 1                            | 1                        | 0.50      | 2.60%               |
| Sep 8         | 66                           | 4                            | 0                        | 1         | 6.06%               |
| Sep 15        | 49                           | 2                            | 1                        | 0.67      | 6.12%               |
| Sep 25        | 49                           | 4                            | 2                        | 0.67      | 12.24%              |
| Oct 6         | 53                           | 8                            | 2                        | 0.80      | 18.87%              |
| Oct 15        | 45                           | 8                            | 1                        | 0.89      | 20%                 |
| Oct 22        | 63                           | 5                            | 6                        | 0.45      | 17.46%              |
| Oct 29        | 41                           | 5                            | 5                        | 0.50      | 24.39%              |

Table S2. Infestation and parasitization data in Casagiove (CE) along with sex ratio of the emerged *Eretmoceris* sp. gr. *serius*. na: not available data.

| Sampling Date | <i>A. spiniferus</i> puparia | N° adult emerged parasitoids |                           | sex-ratio | Parasitization rate |
|---------------|------------------------------|------------------------------|---------------------------|-----------|---------------------|
|               |                              | <i>Eretmocer</i> us sp. ♀    | <i>Eretmocer</i> us sp. ♂ |           |                     |
| May 29        | 8                            | 3                            | 0                         | 1         | 37.50%              |
| Jun 5         | 14                           | 10                           | 0                         | 1         | 71.43%              |
| Jun 12        | 0                            | -                            | -                         | na        | na                  |
| Jun 19        | 0                            | -                            | -                         | na        | na                  |
| Jun 26        | 3                            | 0                            | 0                         | na        | 0%                  |
| Jul 1         | 5                            | 0                            | 0                         | na        | 0%                  |
| Jul 7         | 28                           | 0                            | 0                         | na        | 0%                  |
| Jul 17        | 43                           | 0                            | 0                         | na        | 0%                  |
| Jul 24        | 33                           | 3                            | 1                         | 0.75      | 12.12%              |
| Jul 31        | 19                           | 1                            | 0                         | 1         | 5.26%               |
| Aug 21        | 5                            | 0                            | 0                         | na        | 0%                  |
| Aug 28        | 10                           | 0                            | 0                         | na        | 0%                  |
| Sep 9         | 12                           | 0                            | 0                         | na        | 0%                  |
| Sep 16        | 10                           | 0                            | 0                         | na        | 0%                  |
| Sep 25        | 6                            | 0                            | 0                         | na        | 0%                  |
| Oct 2         | 0                            | -                            | -                         | na        | na                  |
| Oct 9         | 0                            | -                            | -                         | na        | na                  |
| Oct 18        | 0                            | -                            | -                         | na        | na                  |
| Oct 25        | 0                            | -                            | -                         | na        | na                  |
| Nov 2         | 2                            | 0                            | 0                         | na        | 0%                  |

Table S3. Infestation and parasitization data in Portici (NA) along with sex ratio of the emerged *Eretmocer*us sp. gr. *serius*.  
na: not available data
